# Supplementary material for: Simultaneous Detection of Five Foodborne Pathogens Using a Mini Automatic Nucleic Acid Extractor Combined with Recombinase Polymerase Amplification and Lateral Flow Immunoassay
Source: MDPI journal article supplement (doi:10.3390/microorganisms10071352), 2022-07-05
Supplement: s1 [file s1]

Supplementary material:

Figure S1. Optimization of different concentration of each fixed antibody for LFIA

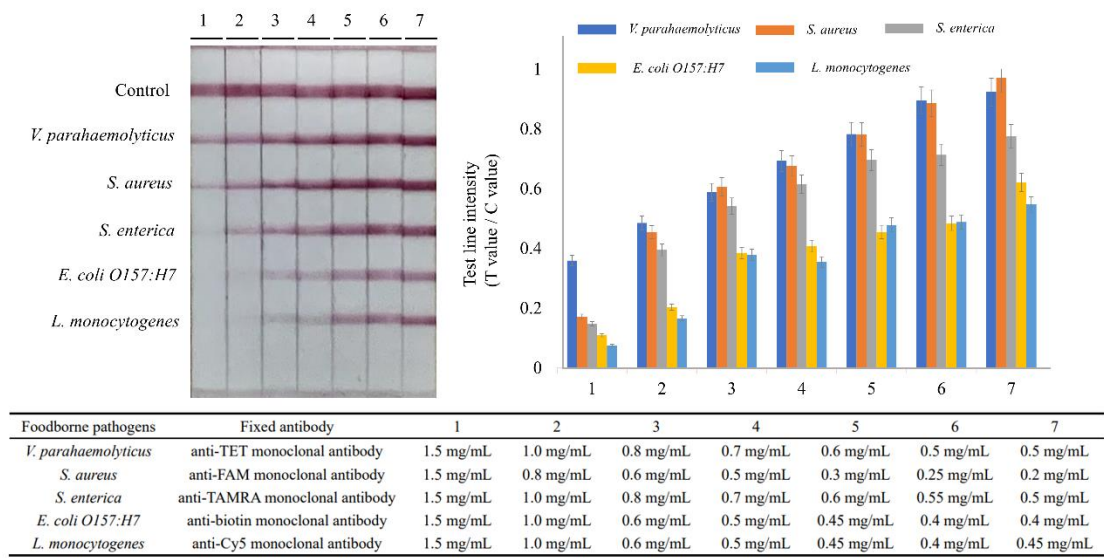

After commissioning, it showed the final concentration of each fixed antibody in T-lines, including 0.5 mg/mL for anti-TET antibody, 0.2 mg/mL for anti-FAM antibody, 0.5 mg/mL for anti-TAMRA antibody, 0.4 mg/mL for anti-biotin antibody, 0.45 mg/mL for Anti-cy5 antibody. The anti-mouse polyclonal antibody was 2.0 mg/mL in C-line.

**Table S1.** The recoveries of five foodborne pathogens in spiked food samples by multiple RPA-LFD.

| Samples<br>(n=6 Each) | <i>V. parahaemolyticus</i>             |                                                      |              |     | <i>S. aureus</i>                       |                                                      |              |     | <i>S. enterica</i>                     |                                                      |              |     | <i>E. coli</i> O157:H7                 |                                                      |              |     | <i>L. monocytogenes</i>                |                                                      |              |     |
|-----------------------|----------------------------------------|------------------------------------------------------|--------------|-----|----------------------------------------|------------------------------------------------------|--------------|-----|----------------------------------------|------------------------------------------------------|--------------|-----|----------------------------------------|------------------------------------------------------|--------------|-----|----------------------------------------|------------------------------------------------------|--------------|-----|
|                       | Inoculation Level<br>(CFU/mL or CFU/g) | RPA-LFIA Detected Concentration<br>(CFU/mL or CFU/g) | Recovery (%) | BMA | Inoculation Level<br>(CFU/mL or CFU/g) | RPA-LFIA Detected Concentration<br>(CFU/mL or CFU/g) | Recovery (%) | BMA | Inoculation Level<br>(CFU/mL or CFU/g) | RPA-LFIA Detected Concentration<br>(CFU/mL or CFU/g) | Recovery (%) | BMA | Inoculation Level<br>(CFU/mL or CFU/g) | RPA-LFIA Detected Concentration<br>(CFU/mL or CFU/g) | Recovery (%) | BMA | Inoculation Level<br>(CFU/mL or CFU/g) | RPA-LFIA Detected Concentration<br>(CFU/mL or CFU/g) | Recovery (%) | BMA |
| Chicken               | 3.5×10 <sup>4</sup>                    | 3.45×10 <sup>4</sup>                                 | 98.6         | +   | 9.5×10 <sup>4</sup>                    | 9.52×10 <sup>4</sup>                                 | 100.2        | +   | 5.2×10 <sup>4</sup>                    | 5.29×10 <sup>4</sup>                                 | 101.7        | +   | 8.9×10 <sup>4</sup>                    | 8.71×10 <sup>4</sup>                                 | 97.9         | +   | 4.5×10 <sup>4</sup>                    | 4.62×10 <sup>4</sup>                                 | 102.7        | +   |
|                       | 3.5×10 <sup>3</sup>                    | 3.34×10 <sup>3</sup>                                 | 95.4         | +   | 9.5×10 <sup>3</sup>                    | 9.43×10 <sup>3</sup>                                 | 99.3         | +   | 5.2×10 <sup>3</sup>                    | 5.41×10 <sup>3</sup>                                 | 104.0        | +   | 8.9×10 <sup>3</sup>                    | 8.93×10 <sup>3</sup>                                 | 100.3        | +   | 4.5×10 <sup>3</sup>                    | 4.53×10 <sup>3</sup>                                 | 100.7        | +   |
|                       | 3.5×10 <sup>2</sup>                    | 3.42×10 <sup>2</sup>                                 | 97.7         | +   | 9.5×10 <sup>2</sup>                    | 9.43×10 <sup>2</sup>                                 | 99.3         | +   | 5.2×10 <sup>2</sup>                    | 5.12×10 <sup>2</sup>                                 | 98.5         | +   | 8.9×10 <sup>2</sup>                    | 8.91×10 <sup>2</sup>                                 | 100.1        | +   | 4.5×10 <sup>2</sup>                    | 4.38×10 <sup>2</sup>                                 | 97.3         | +   |
|                       | 3.5×10 <sup>1</sup>                    | 3.40×10 <sup>1</sup>                                 | 97.1         | -   | 9.5×10 <sup>1</sup>                    | 8.60×10 <sup>1</sup>                                 | 90.5         | -   | 5.2×10 <sup>1</sup>                    | 5.02×10 <sup>1</sup>                                 | 96.5         | -   | 8.9×10 <sup>1</sup>                    | 8.62×10 <sup>1</sup>                                 | 96.9         | -   | 4.5×10 <sup>1</sup>                    | 4.22×10 <sup>1</sup>                                 | 91.6         | -   |
| Pork                  | 3.5×10 <sup>4</sup>                    | 3.43×10 <sup>4</sup>                                 | 98.0         | +   | 9.5×10 <sup>4</sup>                    | 9.84×10 <sup>4</sup>                                 | 103.6        | +   | 5.2×10 <sup>4</sup>                    | 5.32×10 <sup>4</sup>                                 | 102.3        | +   | 8.9×10 <sup>4</sup>                    | 8.99×10 <sup>4</sup>                                 | 101.0        | +   | 4.5×10 <sup>4</sup>                    | 4.58×10 <sup>4</sup>                                 | 101.8        | +   |
|                       | 3.5×10 <sup>3</sup>                    | 3.52×10 <sup>3</sup>                                 | 100.6        | +   | 9.5×10 <sup>3</sup>                    | 9.75×10 <sup>3</sup>                                 | 102.6        | +   | 5.2×10 <sup>3</sup>                    | 4.97×10 <sup>3</sup>                                 | 95.6         | +   | 8.9×10 <sup>3</sup>                    | 8.68×10 <sup>3</sup>                                 | 97.5         | +   | 4.5×10 <sup>3</sup>                    | 4.34×10 <sup>3</sup>                                 | 96.4         | +   |
|                       | 3.5×10 <sup>2</sup>                    | 3.22×10 <sup>2</sup>                                 | 92.0         | +   | 9.5×10 <sup>2</sup>                    | 9.43×10 <sup>2</sup>                                 | 99.3         | +   | 5.2×10 <sup>2</sup>                    | 5.11×10 <sup>2</sup>                                 | 98.3         | +   | 8.9×10 <sup>2</sup>                    | 8.93×10 <sup>2</sup>                                 | 100.3        | +   | 4.5×10 <sup>2</sup>                    | 4.57×10 <sup>2</sup>                                 | 101.6        | +   |
|                       | 3.5×10 <sup>1</sup>                    | 3.23×10 <sup>1</sup>                                 | 92.3         | -   | 9.5×10 <sup>1</sup>                    | 9.25×10 <sup>1</sup>                                 | 97.4         | -   | 5.2×10 <sup>1</sup>                    | 5.18×10 <sup>1</sup>                                 | 99.6         | -   | 8.9×10 <sup>1</sup>                    | 8.73×10 <sup>1</sup>                                 | 98.1         | -   | 4.5×10 <sup>1</sup>                    | 4.42×10 <sup>1</sup>                                 | 98.2         | -   |
| Beef                  | 3.5×10 <sup>4</sup>                    | 3.54×10 <sup>4</sup>                                 | 101.1        | +   | 9.5×10 <sup>4</sup>                    | 9.93×10 <sup>4</sup>                                 | 104.5        | +   | 5.2×10 <sup>4</sup>                    | 5.34×10 <sup>4</sup>                                 | 102.7        | +   | 8.9×10 <sup>4</sup>                    | 8.78×10 <sup>4</sup>                                 | 98.7         | +   | 4.5×10 <sup>4</sup>                    | 4.53×10 <sup>4</sup>                                 | 100.7        | +   |
|                       | 3.5×10 <sup>3</sup>                    | 3.42×10 <sup>3</sup>                                 | 97.7         | +   | 9.5×10 <sup>3</sup>                    | 9.76×10 <sup>3</sup>                                 | 102.7        | +   | 5.2×10 <sup>3</sup>                    | 5.28×10 <sup>3</sup>                                 | 101.5        | +   | 8.9×10 <sup>3</sup>                    | 8.88×10 <sup>3</sup>                                 | 99.8         | +   | 4.5×10 <sup>3</sup>                    | 4.61×10 <sup>3</sup>                                 | 102.4        | +   |
|                       | 3.5×10 <sup>2</sup>                    | 3.58×10 <sup>2</sup>                                 | 102.3        | +   | 9.5×10 <sup>2</sup>                    | 9.74×10 <sup>2</sup>                                 | 102.5        | +   | 5.2×10 <sup>2</sup>                    | 5.37×10 <sup>2</sup>                                 | 103.3        | +   | 8.9×10 <sup>2</sup>                    | 8.83×10 <sup>2</sup>                                 | 99.2         | +   | 4.5×10 <sup>2</sup>                    | 4.28×10 <sup>2</sup>                                 | 95.1         | +   |
|                       | 3.5×10 <sup>1</sup>                    | 3.22×10 <sup>1</sup>                                 | 92.0         | -   | 9.5×10 <sup>1</sup>                    | 9.43×10 <sup>1</sup>                                 | 99.3         | -   | 5.2×10 <sup>1</sup>                    | 5.22×10 <sup>1</sup>                                 | 100.4        | -   | 8.9×10 <sup>1</sup>                    | 8.82×10 <sup>1</sup>                                 | 99.1         | -   | 4.5×10 <sup>1</sup>                    | 4.38×10 <sup>1</sup>                                 | 97.3         | -   |
| Milk                  | 3.5×10 <sup>4</sup>                    | 3.46×10 <sup>4</sup>                                 | 98.9         | +   | 9.5×10 <sup>4</sup>                    | 9.76×10 <sup>4</sup>                                 | 102.7        | +   | 5.2×10 <sup>4</sup>                    | 5.31×10 <sup>4</sup>                                 | 102.1        | +   | 8.9×10 <sup>4</sup>                    | 8.97×10 <sup>4</sup>                                 | 100.8        | +   | 4.5×10 <sup>4</sup>                    | 4.70×10 <sup>4</sup>                                 | 104.4        | +   |
|                       | 3.5×10 <sup>3</sup>                    | 3.35×10 <sup>3</sup>                                 | 95.7         | +   | 9.5×10 <sup>3</sup>                    | 9.83×10 <sup>3</sup>                                 | 103.5        | +   | 5.2×10 <sup>3</sup>                    | 5.23×10 <sup>3</sup>                                 | 100.6        | +   | 8.9×10 <sup>3</sup>                    | 8.94×10 <sup>3</sup>                                 | 100.5        | +   | 4.5×10 <sup>3</sup>                    | 4.64×10 <sup>3</sup>                                 | 103.1        | +   |
|                       | 3.5×10 <sup>2</sup>                    | 3.29×10 <sup>2</sup>                                 | 94.0         | +   | 9.5×10 <sup>2</sup>                    | 9.84×10 <sup>2</sup>                                 | 103.6        | +   | 5.2×10 <sup>2</sup>                    | 5.09×10 <sup>2</sup>                                 | 97.9         | +   | 8.9×10 <sup>2</sup>                    | 8.92×10 <sup>2</sup>                                 | 100.2        | +   | 4.5×10 <sup>2</sup>                    | 4.55×10 <sup>2</sup>                                 | 101.1        | +   |
|                       | 3.5×10 <sup>1</sup>                    | 3.46×10 <sup>1</sup>                                 | 98.9         | -   | 9.5×10 <sup>1</sup>                    | 9.24×10 <sup>1</sup>                                 | 97.3         | -   | 5.2×10 <sup>1</sup>                    | 5.15×10 <sup>1</sup>                                 | 99.0         | -   | 8.9×10 <sup>1</sup>                    | 8.87×10 <sup>1</sup>                                 | 99.7         | -   | 4.5×10 <sup>1</sup>                    | 4.34×10 <sup>1</sup>                                 | 96.4         | -   |
| Shrimp                | 3.5×10 <sup>4</sup>                    | 3.57×10 <sup>4</sup>                                 | 102.0        | +   | 9.5×10 <sup>4</sup>                    | 9.64×10 <sup>4</sup>                                 | 101.5        | +   | 5.2×10 <sup>4</sup>                    | 5.37×10 <sup>4</sup>                                 | 103.3        | +   | 8.9×10 <sup>4</sup>                    | 8.89×10 <sup>4</sup>                                 | 99.9         | +   | 4.5×10 <sup>4</sup>                    | 4.52×10 <sup>4</sup>                                 | 100.4        | +   |
|                       | 3.5×10 <sup>3</sup>                    | 3.56×10 <sup>3</sup>                                 | 101.7        | +   | 9.5×10 <sup>3</sup>                    | 9.53×10 <sup>3</sup>                                 | 100.3        | +   | 5.2×10 <sup>3</sup>                    | 4.89×10 <sup>3</sup>                                 | 94.0         | +   | 8.9×10 <sup>3</sup>                    | 8.84×10 <sup>3</sup>                                 | 99.3         | +   | 4.5×10 <sup>3</sup>                    | 4.62×10 <sup>3</sup>                                 | 102.7        | +   |
|                       | 3.5×10 <sup>2</sup>                    | 3.42×10 <sup>2</sup>                                 | 97.7         | +   | 9.5×10 <sup>2</sup>                    | 9.46×10 <sup>2</sup>                                 | 99.6         | +   | 5.2×10 <sup>2</sup>                    | 4.99×10 <sup>2</sup>                                 | 96.0         | +   | 8.9×10 <sup>2</sup>                    | 8.93×10 <sup>2</sup>                                 | 100.3        | +   | 4.5×10 <sup>2</sup>                    | 4.28×10 <sup>2</sup>                                 | 95.1         | +   |
|                       | 3.5×10 <sup>1</sup>                    | 3.57×10 <sup>1</sup>                                 | 102.0        | -   | 9.5×10 <sup>1</sup>                    | 9.67×10 <sup>1</sup>                                 | 101.8        | -   | 5.2×10 <sup>1</sup>                    | 5.11×10 <sup>1</sup>                                 | 98.3         | -   | 8.9×10 <sup>1</sup>                    | 8.81×10 <sup>1</sup>                                 | 99.0         | -   | 4.5×10 <sup>1</sup>                    | 4.26×10 <sup>1</sup>                                 | 94.7         | -   |
| Fish                  | 3.5×10 <sup>4</sup>                    | 3.25×10 <sup>4</sup>                                 | 92.9         | +   | 9.5×10 <sup>4</sup>                    | 9.78×10 <sup>4</sup>                                 | 102.9        | +   | 5.2×10 <sup>4</sup>                    | 5.22×10 <sup>4</sup>                                 | 100.4        | +   | 8.9×10 <sup>4</sup>                    | 8.98×10 <sup>4</sup>                                 | 100.9        | +   | 4.5×10 <sup>4</sup>                    | 4.56×10 <sup>4</sup>                                 | 101.3        | +   |
|                       | 3.5×10 <sup>3</sup>                    | 3.45×10 <sup>3</sup>                                 | 98.6         | +   | 9.5×10 <sup>3</sup>                    | 9.67×10 <sup>3</sup>                                 | 101.8        | +   | 5.2×10 <sup>3</sup>                    | 5.28×10 <sup>3</sup>                                 | 101.5        | +   | 8.9×10 <sup>3</sup>                    | 8.93×10 <sup>3</sup>                                 | 100.3        | +   | 4.5×10 <sup>3</sup>                    | 4.45×10 <sup>3</sup>                                 | 98.9         | +   |
|                       | 3.5×10 <sup>2</sup>                    | 3.52×10 <sup>2</sup>                                 | 100.6        | +   | 9.5×10 <sup>2</sup>                    | 9.45×10 <sup>2</sup>                                 | 99.5         | +   | 5.2×10 <sup>2</sup>                    | 5.16×10 <sup>2</sup>                                 | 99.2         | +   | 8.9×10 <sup>2</sup>                    | 8.92×10 <sup>2</sup>                                 | 100.2        | +   | 4.5×10 <sup>2</sup>                    | 4.35×10 <sup>2</sup>                                 | 96.7         | +   |
|                       | 3.5×10 <sup>1</sup>                    | 3.53×10 <sup>1</sup>                                 | 100.9        | -   | 9.5×10 <sup>1</sup>                    | 9.74×10 <sup>1</sup>                                 | 102.5        | -   | 5.2×10 <sup>1</sup>                    | 4.71×10 <sup>1</sup>                                 | 90.6         | -   | 8.9×10 <sup>1</sup>                    | 8.89×10 <sup>1</sup>                                 | 99.9         | -   | 4.5×10 <sup>1</sup>                    | 4.53×10 <sup>1</sup>                                 | 100.7        | -   |

BAM: bacteriological analytical manual. “+”: positive result; “-”: negative result.

The recoveries in six spiked samples were 92.0-102.3% (for *V. parahaemolyticus*), 90.5-104.5% (for *S. aureus*), 90.6-104.0% (for *S. enterica*), 96.9-101.0% (for *E. coli* O157:H7), and 91.6-104.4% (for *L. monocytogenes*).

**Table S2. Comparison of manual extraction and automatic nucleic acid extractor**

| Sample  | Manual extraction                                 |              | automatic nucleic acid extractor                  |              |
|---------|---------------------------------------------------|--------------|---------------------------------------------------|--------------|
|         | Average nucleic acid content<br>(copies/ $\mu$ L) | Recovery (%) | Average nucleic acid content<br>(copies/ $\mu$ L) | Recovery (%) |
| Chicken | 18739                                             | 85.34        | 20349                                             | 92.67        |
| Pork    | 19348                                             | 81.78        | 22057                                             | 93.23        |
| Beef    | 18064                                             | 89.67        | 18485                                             | 91.76        |
| Milk    | 18995                                             | 87.42        | 20060                                             | 92.32        |
| Shrimp  | 10343                                             | 88.69        | 10736                                             | 92.06        |
| Fish    | 10035                                             | 84.77        | 10797                                             | 91.21        |

The recovery rate was obtained when compared to the standard quantity value.

**Table S3. Comparison of the proposed method for foodborne pathogens detection with other methods**

| Method      | Analyte                                                                                                                           | LOD                                                                                                          | Reference  |
|-------------|-----------------------------------------------------------------------------------------------------------------------------------|--------------------------------------------------------------------------------------------------------------|------------|
| on-chip RPA | <i>Staphylococcus aureus</i><br><i>Salmonella enterica</i>                                                                        | $1 \times 10^1$ CFU/mL                                                                                       | [1]        |
| cPCR-NALF   | <i>Salmonella</i> Enteritidis<br><i>Salmonella</i> Typhimurium<br><i>Escherichia coli</i> O157:H7                                 | $4.5 \times 10^4$ CFU/mL<br>$4.5 \times 10^4$ CFU/mL<br>$2.3 \times 10^3$ CFU/mL                             | [2]        |
| mLAMP-LFD   | <i>Salmonella</i> spp.<br><i>Cronobacter</i> spp.<br><i>Staphylococcus aureus</i>                                                 | 4.2 CFU/mL<br>2.6 CFU/mL<br>3.4 CFU/mL                                                                       | [3]        |
| Rti-RPA     | <i>Campylobacteriosis coli</i><br><i>Campylobacteriosis jejuni</i><br><i>Salmonella enterica</i>                                  | $4 \times 10^1$ CFU/mL                                                                                       | [4]        |
| direct-RPA  | <i>Escherichia coli</i> O157:H7<br><i>Vibrio parahaemolyticus</i><br><i>Vibrio parahaemolyticus</i>                               | 4 cells per 3.2 $\mu$ L of milk samples<br>$2.4 \times 10^1$ CFU/mL                                          | [5]        |
| RPA-LFIA    | <i>Staphylococcus aureus</i><br><i>Salmonella</i> Enteritidis<br><i>Escherichia coli</i> O157:H7<br><i>Listeria monocytogenes</i> | $7.1 \times 10^1$ CFU/mL<br>$4.5 \times 10^1$ CFU/mL<br>$5.1 \times 10^1$ CFU/mL<br>$2.7 \times 10^1$ CFU/mL | This study |

cPCR: convection polymerase chain reaction; NALF: nucleic acid lateral flow;

mLAMP-LFD : multiplex loop-mediated isothermal amplification combined with

lateral flow dipstick; Rti-RPA: real-time recombinase polymerase amplification

## Reference

- [1] Kersting, S.; Rausch, V.; Bier, F. F.; von. Nickisch-Rosenegk, M. Multiplex isothermal solid-phase recombinase polymerase amplification for the specific and fast DNA-based detection of three bacterial pathogens. *Mikrochim Acta* **2014**, 181, 1715-1723.
- [2] Kim, T.-H.; Hwang, H. J.; Kim, J. H. Ultra-fast on-site molecular detection of foodborne pathogens using a combination of convection polymerase chain reaction and nucleic acid lateral flow immunoassay. *Foodborne Pathog. Dis.* **2019**, 16, 144-151.
- [3] Jiang, Y.; Chen, S.; Zhao, Y.; Yang, X.; Fu, S.; McKillip, J. L.; Fox, E. M.; Man, C. Multiplex loop-mediated isothermal amplification-based lateral flow dipstick for simultaneous detection of 3 food-borne pathogens in powdered infant formula. *Int. J. Dairy Sci.* **2020**, 103, 4002-4012.
- [4] Kim, J. Y.; Lee, J.-L. Development of a multiplex real-time recombinase polymerase amplification (RPA) assay for rapid quantitative detection of *Campylobacter coli* and *jejuni* from eggs and chicken products. *Food Control* **2017**, 73, 1247-1255.
- [5] Choi, G.; Jung, J. H.; Park, B. H.; Oh, S. J.; Seo, J. H.; Choi, J. S.; Kim, D. H.; Seo, T. S. A centrifugal direct recombinase polymerase amplification (direct-RPA) microdevice for multiplex and real-time identification of food poisoning bacteria. *Lab Chip* **2016**, 16, 2309-2316.
